# Supplementary material for: Regional Microglial Response in Entorhino–Hippocampal Slice Cultures to Schaffer Collateral Lesion and Metalloproteinases Modulation
Source: MDPI journal article supplement (doi:10.3390/ijms25042346), 2024-02-16

Figure S1

Representative original blots for Iba1, and their corresponding internal control GAPDH.

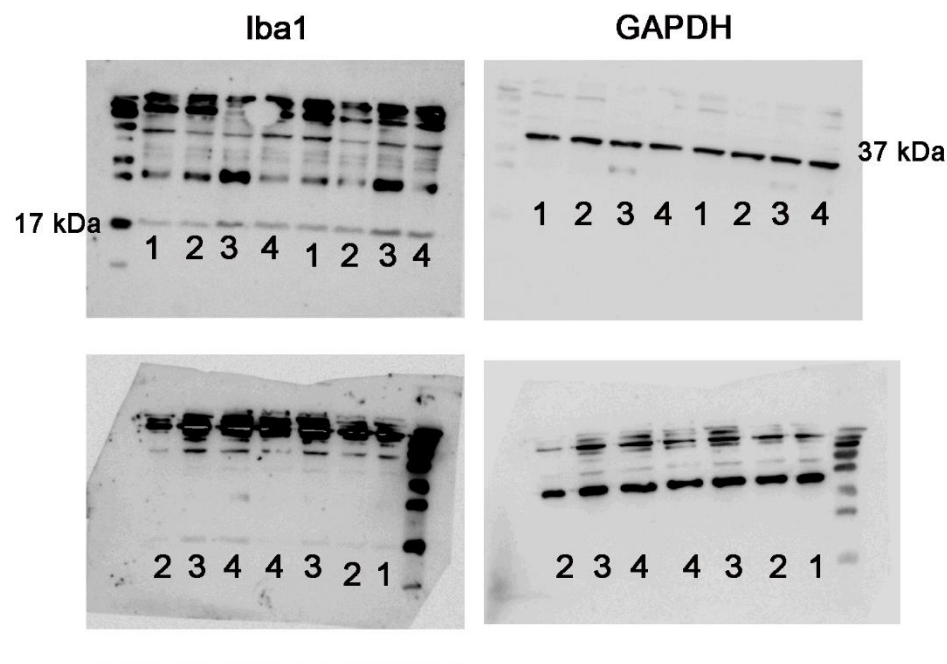

Representative original blots for GFAP, and their corresponding internal control GAPDH.

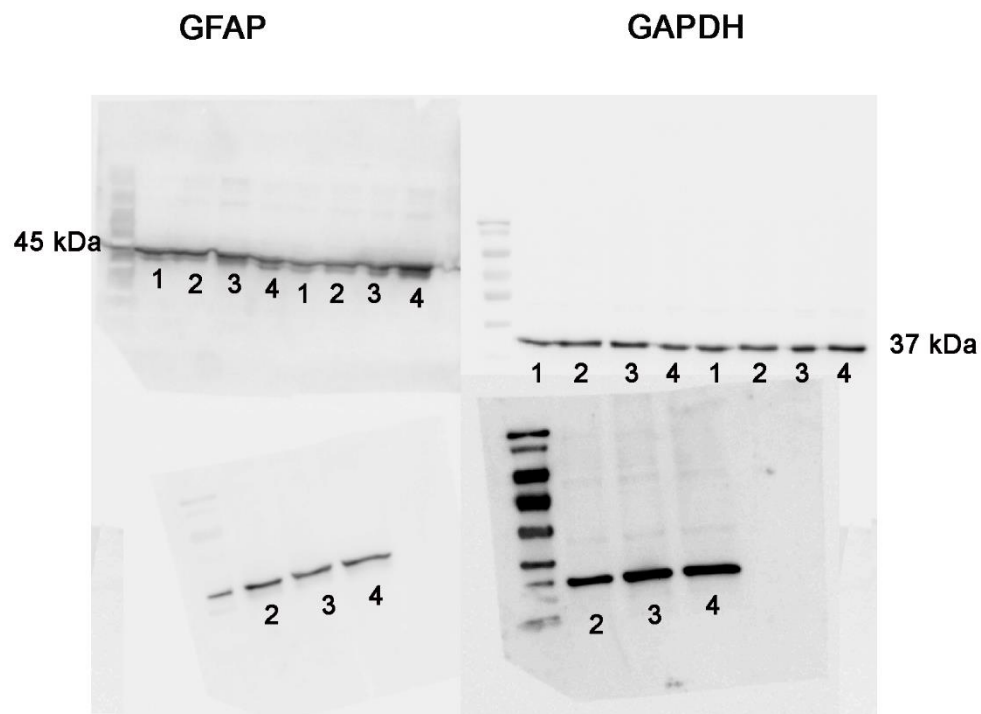

Supplement: s1 [file s1]
